# Supplementary material
Source: PubMed Central journal article supplement (PMC4562797)
Supplement: NIHMS719565-supplement-Supplement1.pdf [file NIHMS719565-supplement-Supplement1.pdf]

## Supplementary Appendix

This appendix has been provided by the authors to give readers additional information about their work.

Supplement to: Sweeney CJ, Chen Y-H, Carducci M, et al. Chemohormonal therapy in metastatic hormone-sensitive prostate cancer. *N Engl J Med* 2015;373:737-46. DOI: 10.1056/NEJMoa1503747

## **Supplementary Material**

### **Table of Contents**

|                                                                       |   |
|-----------------------------------------------------------------------|---|
| Appendix 1 - Figure S1: Consort Diagram                               | 2 |
| Appendix 2 - Figure S2A: Time to Castration Resistant Prostate Cancer | 3 |
| Appendix 3 - Figure S2B: Time to Clinical Progression                 | 4 |
| Appendix 4 - Table S1: Causes of Death                                | 5 |
| Appendix 5 - Table S2: Docetaxel doses given                          | 6 |
| Appendix 6 - Table S3 Therapy beyond confirmed progression            | 7 |

**Figure S1: CONSORT Diagram**

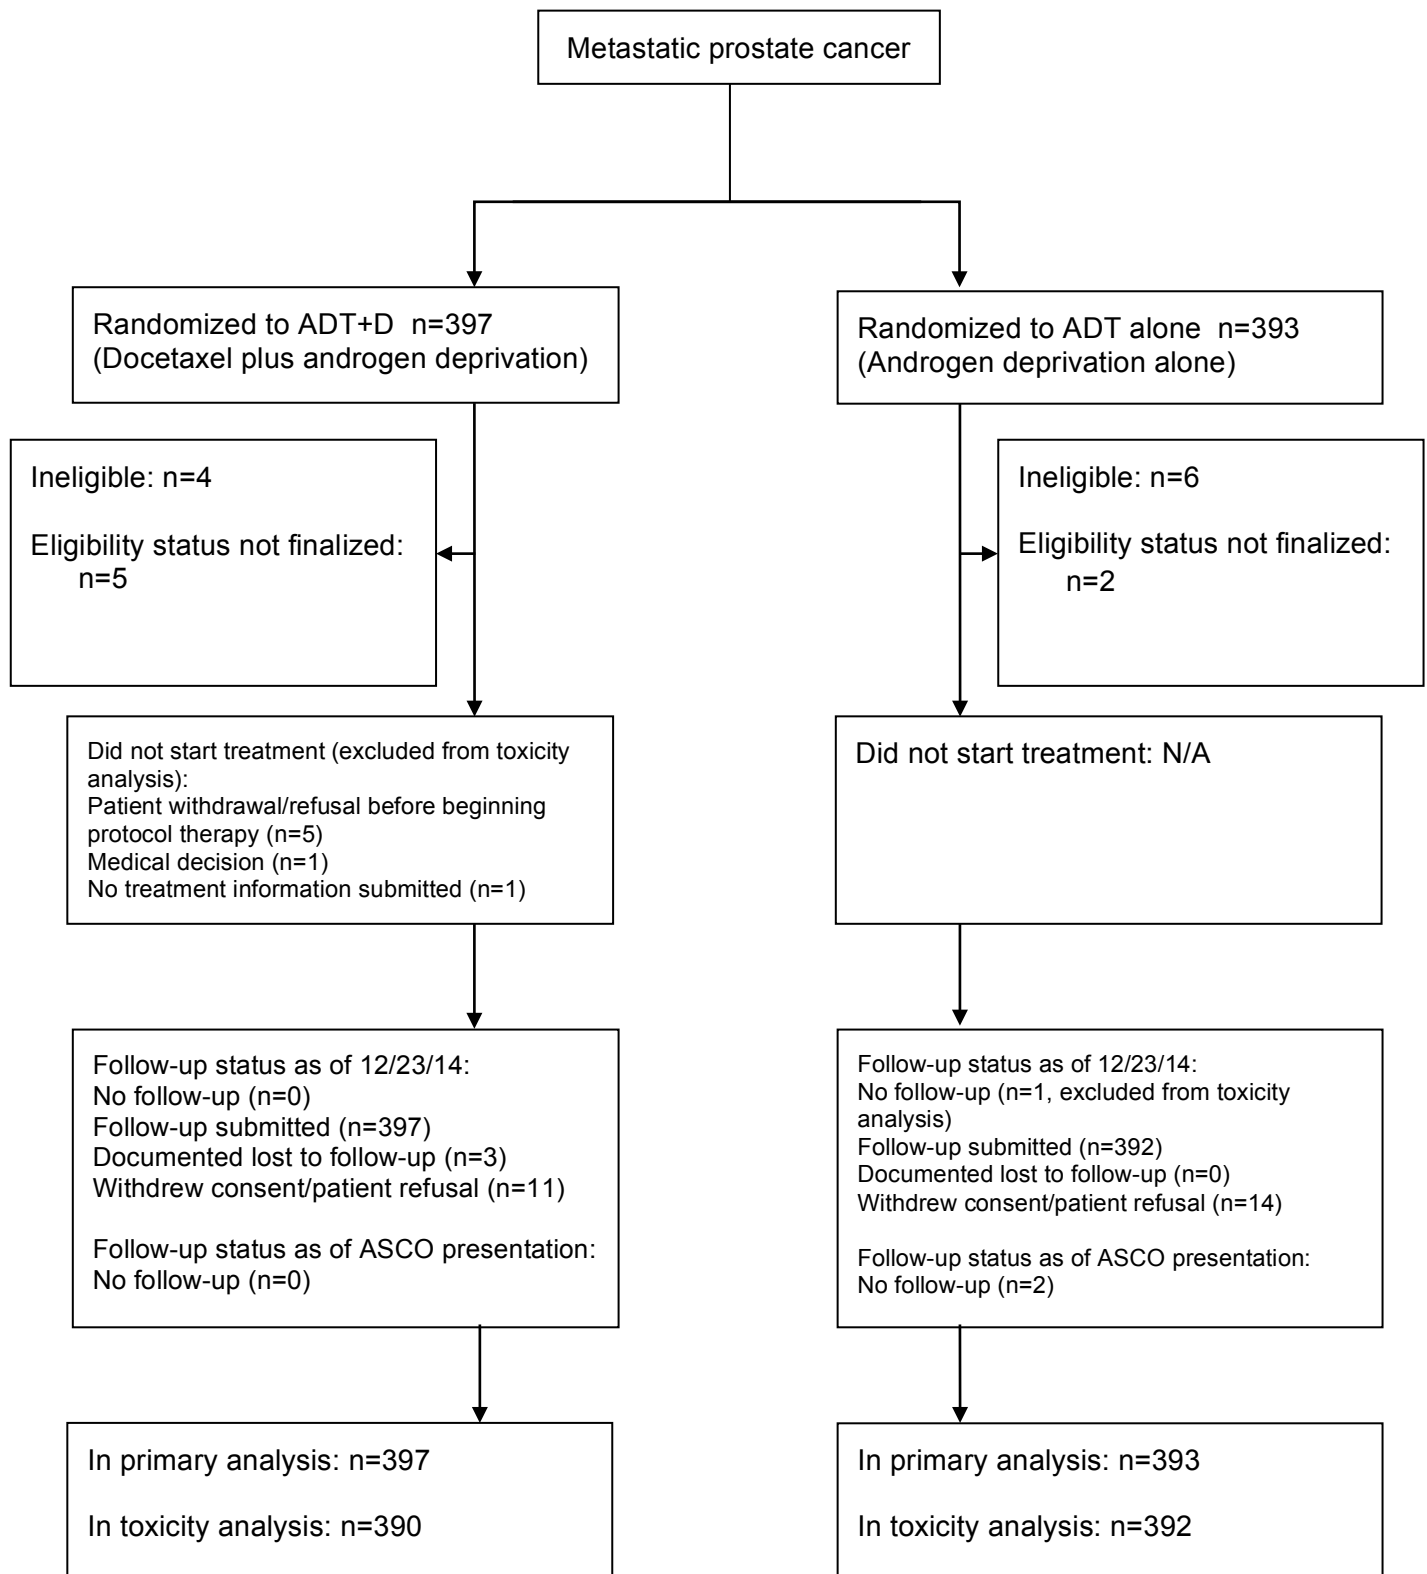

Figure S2A: Time to Castration Resistant Prostate Cancer

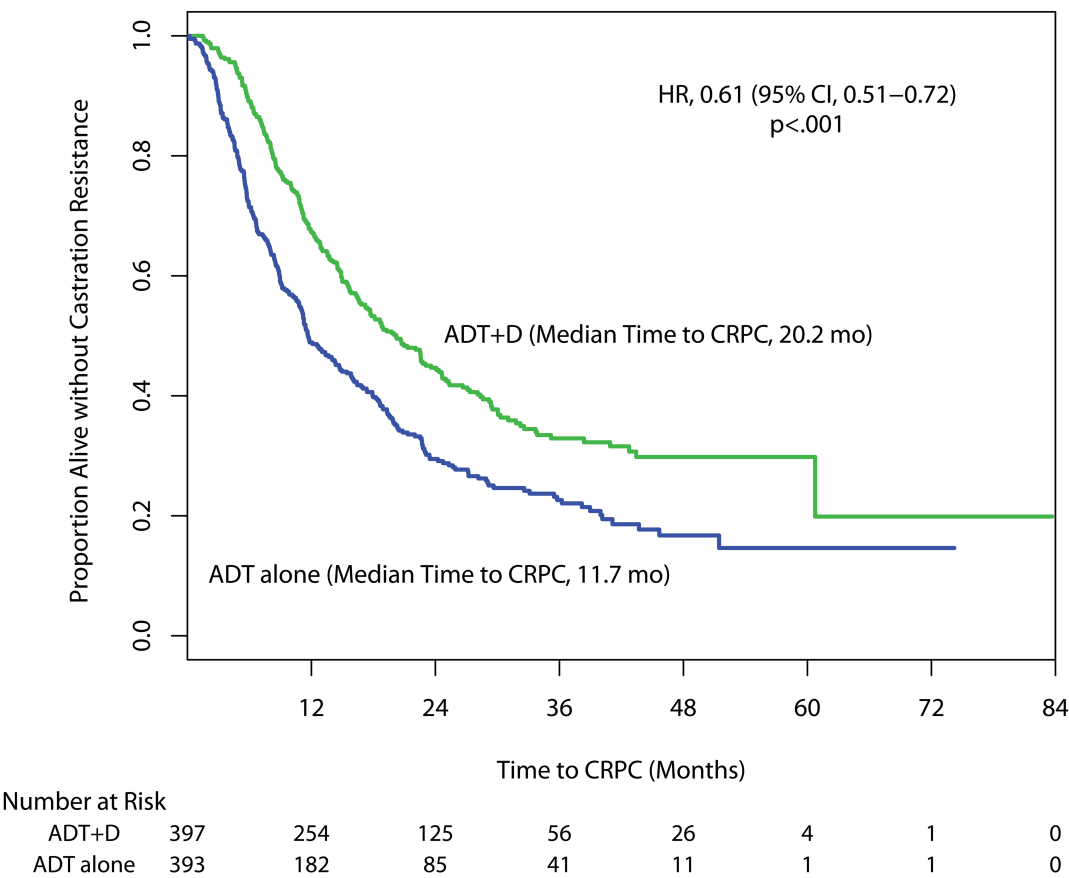

**Figure Legend:** Time to castration resistant prostate cancer: time from randomization to PSA progression or clinical progression, whichever occurs first. Patients without documented progression of any kind were censored at the date of last disease assessment.

**Figure S2B: Time to Clinical Progression**

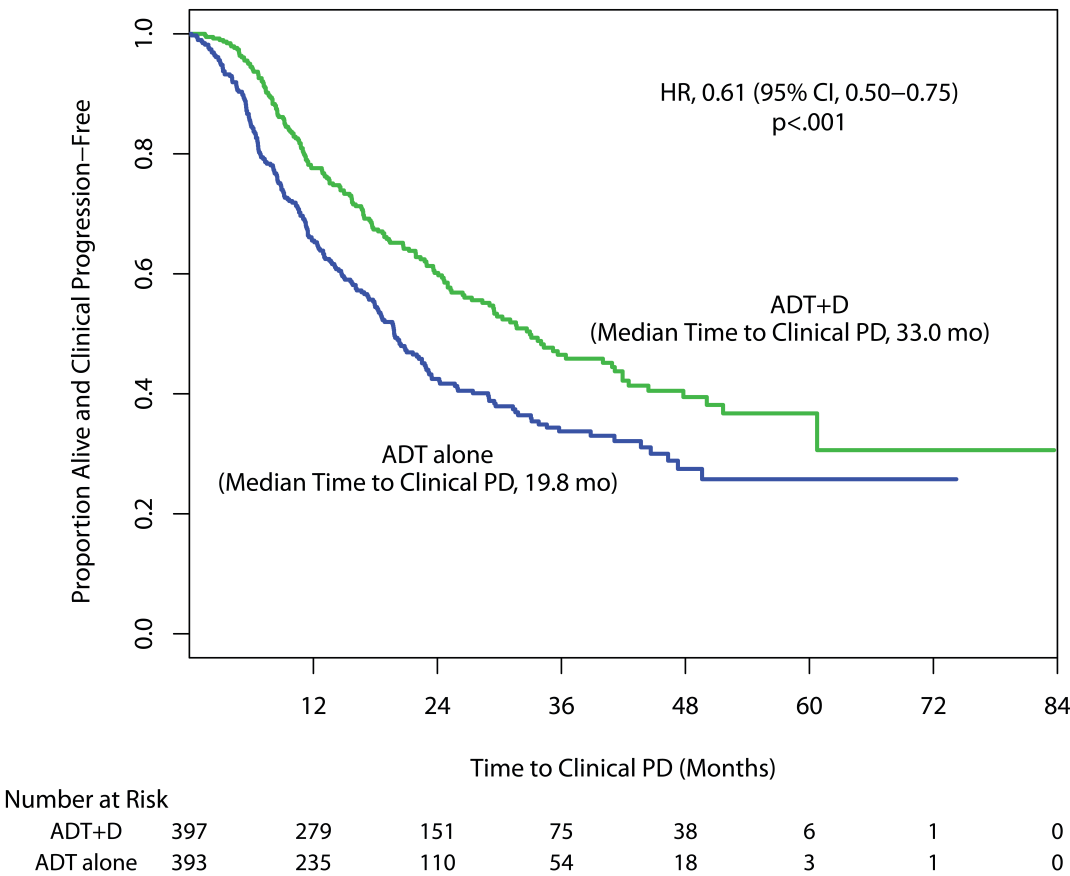

**Figure Legend:** Time to clinical progression was defined as the time from randomization to clinical progression. Patients without clinical progression were censored at the date of last clinical disease evaluation

**Table S1: Causes of Death**

|                               | <b>ADT + D (N=397)</b> |      | <b>ADT alone (N=393)</b> |      |
|-------------------------------|------------------------|------|--------------------------|------|
|                               | N                      | %    | N                        | %    |
| <b>Due to prostate cancer</b> | 85                     | 84.2 | 114                      | 85.1 |
| <b>Due to protocol Rx</b>     | 1                      | 1.0  | 0                        | 0.0  |
| <b>Other cause</b>            | 8                      | 7.9  | 11                       | 8.2  |
| <b>Unknown</b>                | 7                      | 6.9  | 9                        | 6.7  |
| <b>Missing</b>                | 0                      |      | 2                        |      |
| <b>Total</b>                  | 101                    |      | 136                      |      |

**Table S2: Docetaxel doses given**

|                               | <b>ADT + Docetaxel (N=390*)</b> |             |
|-------------------------------|---------------------------------|-------------|
| <b>Number of cycles</b>       | <b>Patients</b>                 | <b>%</b>    |
| <b>1</b>                      | <b>12</b>                       | <b>3.1</b>  |
| <b>2</b>                      | <b>7</b>                        | <b>1.8</b>  |
| <b>3</b>                      | <b>7</b>                        | <b>1.8</b>  |
| <b>4</b>                      | <b>13</b>                       | <b>3.3</b>  |
| <b>5</b>                      | <b>15</b>                       | <b>3.9</b>  |
| <b>6</b>                      | <b>335</b>                      | <b>86.1</b> |
| <b>Unknown</b>                | <b>1</b>                        |             |
| <b>Total treated patients</b> | <b>390</b>                      |             |

**\*Among 390 treated patients.**

**Table S3: Therapy beyond confirmed progression**

|                                                                    | <b>ADT + D (N=397)<br/>N</b> | <b>ADT (N=393)<br/>N</b> |
|--------------------------------------------------------------------|------------------------------|--------------------------|
| <b>Serological progression/ clinical progression</b>               | <b>238</b>                   | <b>287</b>               |
| <b>Clinical progression</b>                                        | <b>180</b>                   | <b>228</b>               |
|                                                                    |                              |                          |
| <b>Docetaxel<sup>°</sup></b>                                       | <b>54</b>                    | <b>137<sup>^</sup></b>   |
| <b>Other chemotherapy</b>                                          |                              |                          |
| <b>Cabazitaxel<sup>°</sup></b>                                     | <b>57</b>                    | <b>37</b>                |
| <b>Mitoxantrone and/or platinum</b>                                | <b>29</b>                    | <b>27</b>                |
| <b>Hormonal therapy</b>                                            |                              |                          |
| <b>Abiraterone and/or enzalutamide<sup>°</sup></b>                 | <b>105<sup>*</sup></b>       | <b>104<sup>#</sup></b>   |
| <b>Antiandrogen and/or ketoconazole</b>                            | <b>80</b>                    | <b>91</b>                |
| <b>Immunotherapy</b>                                               |                              |                          |
| <b>Sipuleucel T<sup>°</sup></b>                                    | <b>22</b>                    | <b>19</b>                |
| <b>Radiotherapy</b>                                                | <b>69</b>                    | <b>79</b>                |
| <b>Use of agent(s) shown to prolong overall survival for mCRPC</b> |                              |                          |
| <b>1 or more</b>                                                   | <b>150</b>                   | <b>187</b>               |
| <b>2 or more</b>                                                   | <b>71</b>                    | <b>83</b>                |

This data set represents number of patients who had progressed and treatment given as of December 23, 2014 whereas survival data represents data as of December 23, 2013.

<sup>^</sup>10 other patients had docetaxel prior to confirmed progression.

<sup>\*</sup>2 pts may have had placebo on trial

<sup>°</sup> Denotes agents with phase 3 data noted to prolong overall survival in metastatic CRPC (mCRPC)

<sup>#</sup>9 pts may have had placebo on trial
